# Supplementary material for: Migration, reactivity, and sulfur tolerance of copper species in SAPO-34 zeolite toward NOx reduction with ammonia
Source: Royal Society of Chemistry journal article supplement (doi:10.1039/c7ra06947b), 2017-01-01
Supplement: c7ra06947b1.pdf [file c7ra06947b1.pdf]

Supplementary material for

# Migration, reactivity, and sulfur tolerance of copper species in SAPO-34 zeolite toward NO<sub>x</sub> reduction with ammonia

Xuesong Liu<sup>a,b\*</sup>, Xiaodong Wu<sup>b\*\*</sup>, Duan Weng<sup>b</sup>, Zhichun Si<sup>c</sup>, Rui Ran<sup>b</sup>

<sup>a</sup> *College of Chemistry and Chemical Engineering, Shaoxing University, Zhejiang 312000, PR China*

<sup>b</sup> *Key Laboratory of Advanced Materials of Ministry of Education, School of Materials Science and Engineering, Tsinghua University, Beijing 100084, PR China*

<sup>c</sup> *Advanced Materials Institute, Graduate School at Shenzhen, Tsinghua University, Shenzhen 518055, China*

\* Corresponding author. E-mail address: [xuesongliu@usx.edu.cn](mailto:xuesongliu@usx.edu.cn) (X. Liu);

\*\* Corresponding author. E-mail address: [wuxiaodong@tsinghua.edu.cn](mailto:wuxiaodong@tsinghua.edu.cn) (X. Wu)

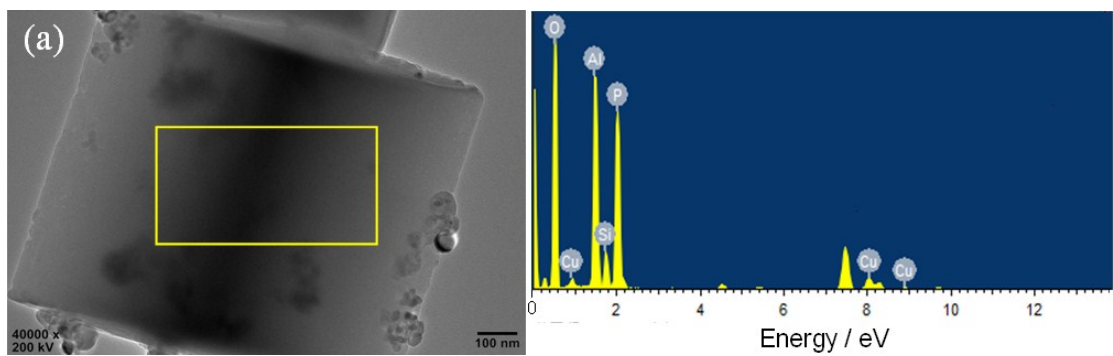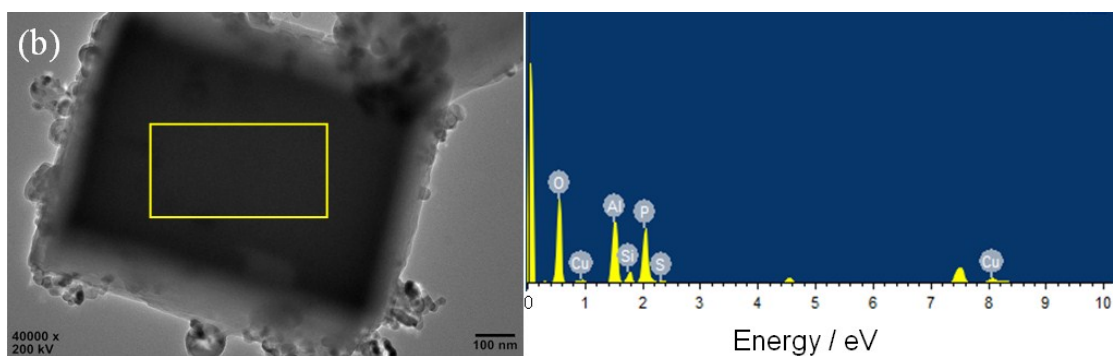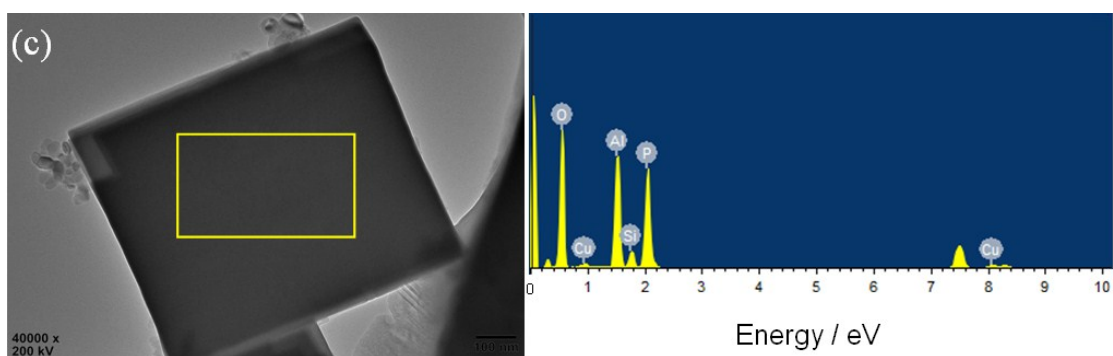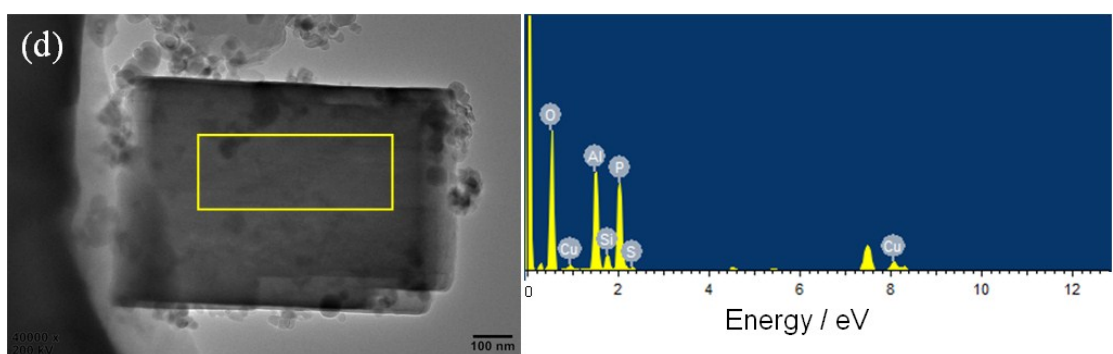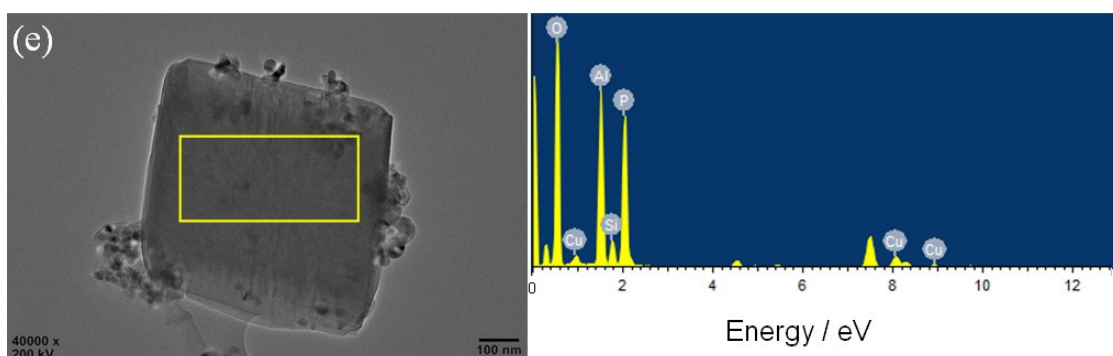

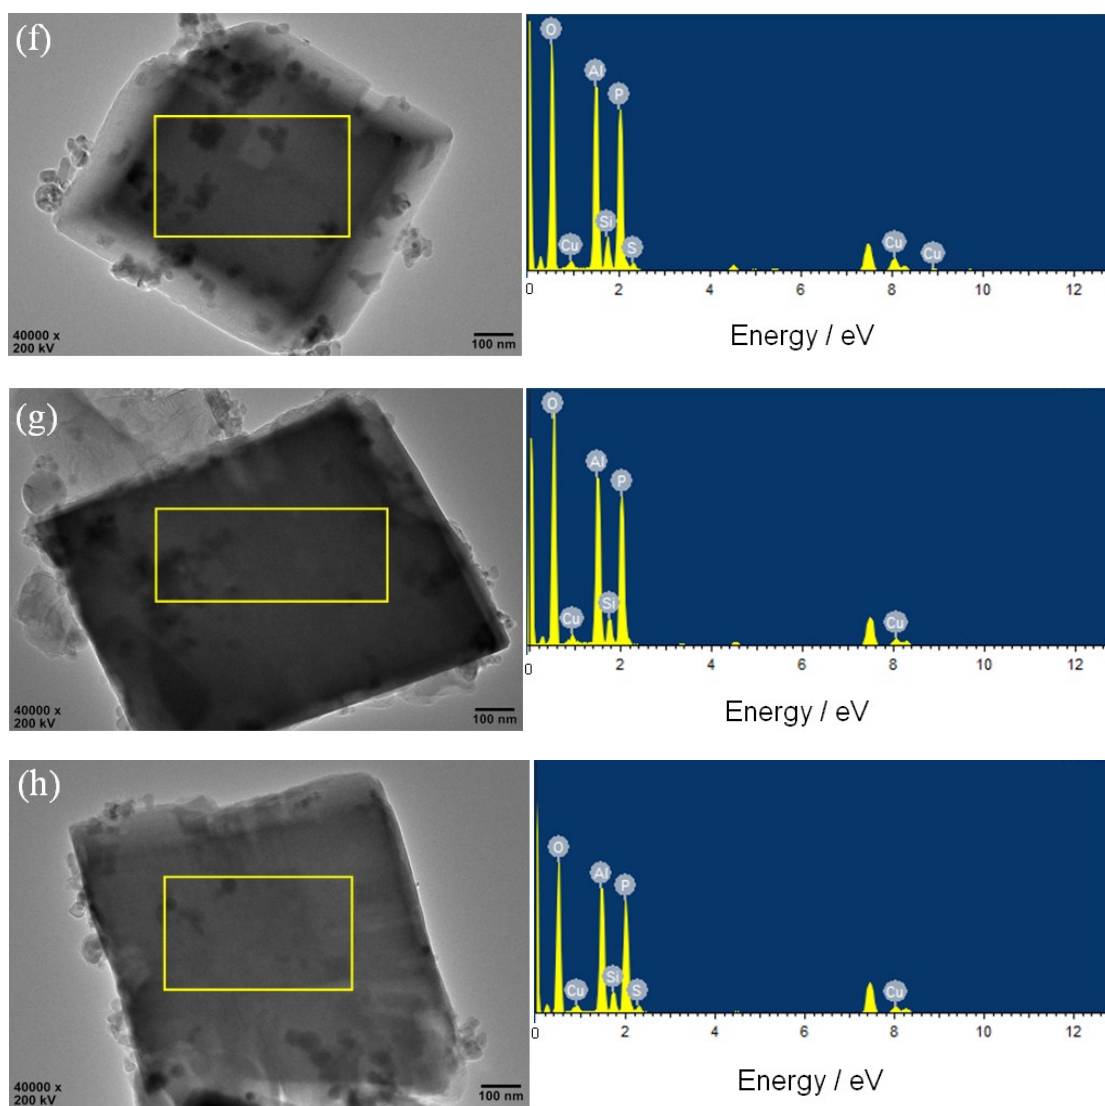

Fig. S1 TEM images and EDX spectra of (a) CuiF, (b) CuiF-s (c) CuiA, (d) CuiA-s (e) CueF, (f) CueF-s, (g) CueA and (h) CueA-s catalysts.

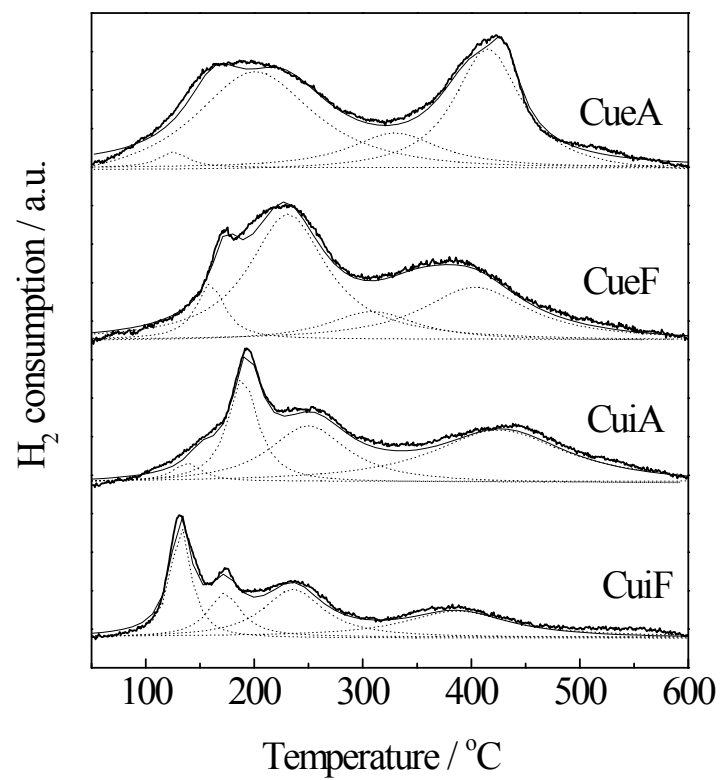

Fig. S2. H<sub>2</sub>-TPR curves of Cu/SAPO-34 catalysts.

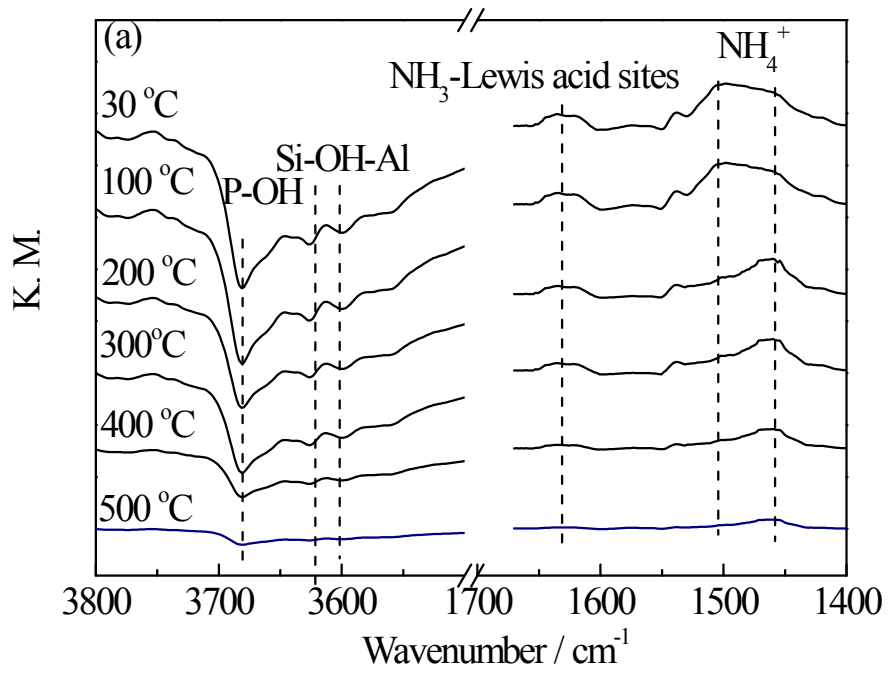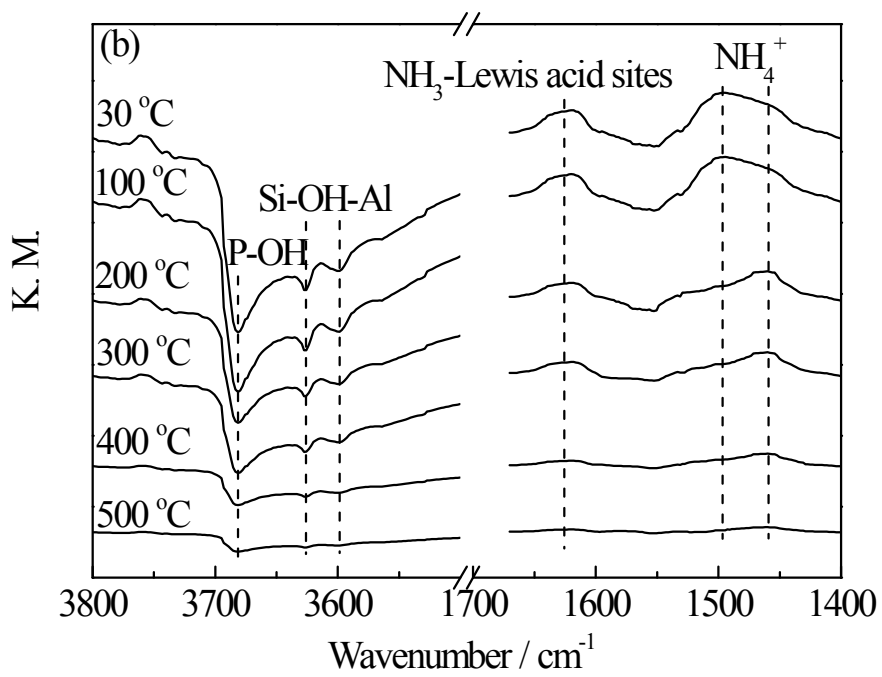

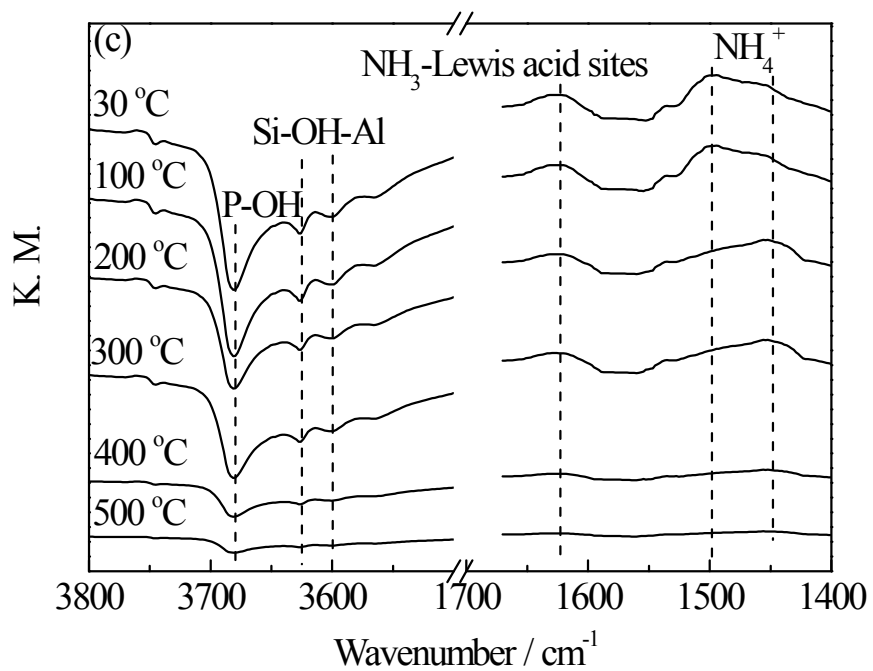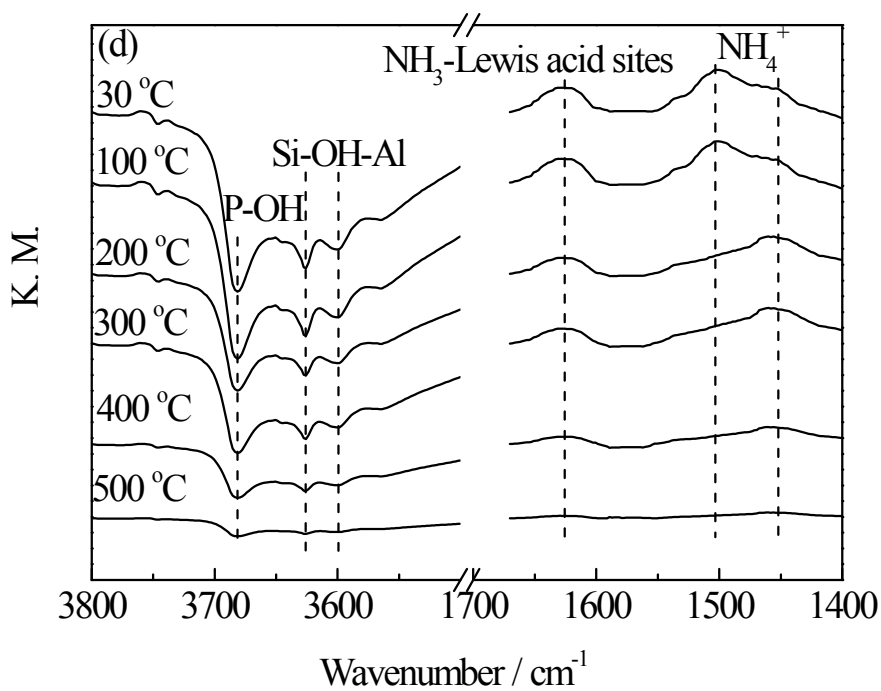

Fig. S3. DRIFT spectra of (a) CuiF, (b) CuiA, (c) CueF and (d) CueA catalysts exposed to NH<sub>3</sub>/N<sub>2</sub> at different temperatures.
